# Supplementary material for: A Stress-Responsive NAC Transcription Factor from Tiger Lily (LlNAC2) Interacts with LlDREB1 and LlZHFD4 and Enhances Various Abiotic Stress Tolerance in Arabidopsis
Source: MDPI journal article supplement (doi:10.3390/ijms20133225), 2019-06-30

# LIZHFD CDS translation

```

1 ATGGATCTCCCCATTTATCAAGGGGATATCCATGACAACCAACAAC
  M D L P I Y Q G D I H D N H N
46 AAAAGTGGGGCGGCGGGCGGTGAAGTACAAGGAGTGCTGAAG
  K S G A A A A V K Y K E C L K
91 AACCATGCAGCCACCATTGGAGTCATTGCCATTGATGGGTGTGGG
  N H A A T I G V I A I D G C G
136 GAGTTCATGCCGAGTGGGGAGGAGGGCACACTGGAGGCCCTTAGA
  E F M P S G E E G T L E A L R
181 TGCTCAGCCTGCGGCTGCCACCGGAACCTCCACAGAAAAGAGACT
  C S A C G C H R N F H R K E T
226 GAAGGAGAGGCTTCATCGTGTGGGTGCTCCACAAGCTCTTGTC
  E G E A S S C G C S H K L L S
271 CCGCACCATATGATCATGCCCTTGGCCCTGCAGGCCTCGGAGCCA
  P H H M I M P L A L Q A S E P
316 TTTGGCATGGTGAGGAAGAGATTCAGGACCAAGTTCACGCCGGGG
  F G M V R K R F R T K F T P G
361 CAGAAGGAGAAGATGCTAGGGTTTGCTGAAAGAGTTGGATGGAAG
  Q K E K M L G F A E R V G W K
406 ATGCAGAGGCTGGATGAGGGTGTGGTGCAGCAGTTCTGTGAGGAG
  M Q R L D E G V V Q Q F C Q E
451 GTTGGGGTGAAGAGGAGGGTGCTCAAGGTTTGGATGCACAACAAC
  V G V K R R V L K V W M H N N
496 AAGCAGAATTTGGCAAAAAGGATCCATTGCAGAGTGACTACTGA
  K Q N L A K K D P L Q S D Y *
  
```

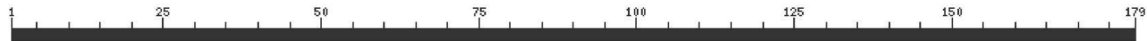

Query seq.  
Specific hits  
Non-specific  
hits  
Superfamilies

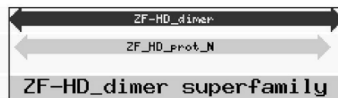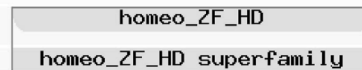

Supplement: s1 [file s1]
