# Supplementary figures and images for: A Stress-Responsive NAC Transcription Factor from Tiger Lily (LlNAC2) Interacts with LlDREB1 and LlZHFD4 and Enhances Various Abiotic Stress Tolerance in Arabidopsis
Source: MDPI journal article supplement (doi:10.3390/ijms20133225), 2019-06-30

Marker

1

2

3

4

5

6

7

8

9

10

11

12

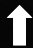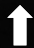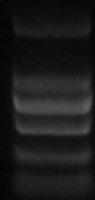

Supplement: s1 [file s1]

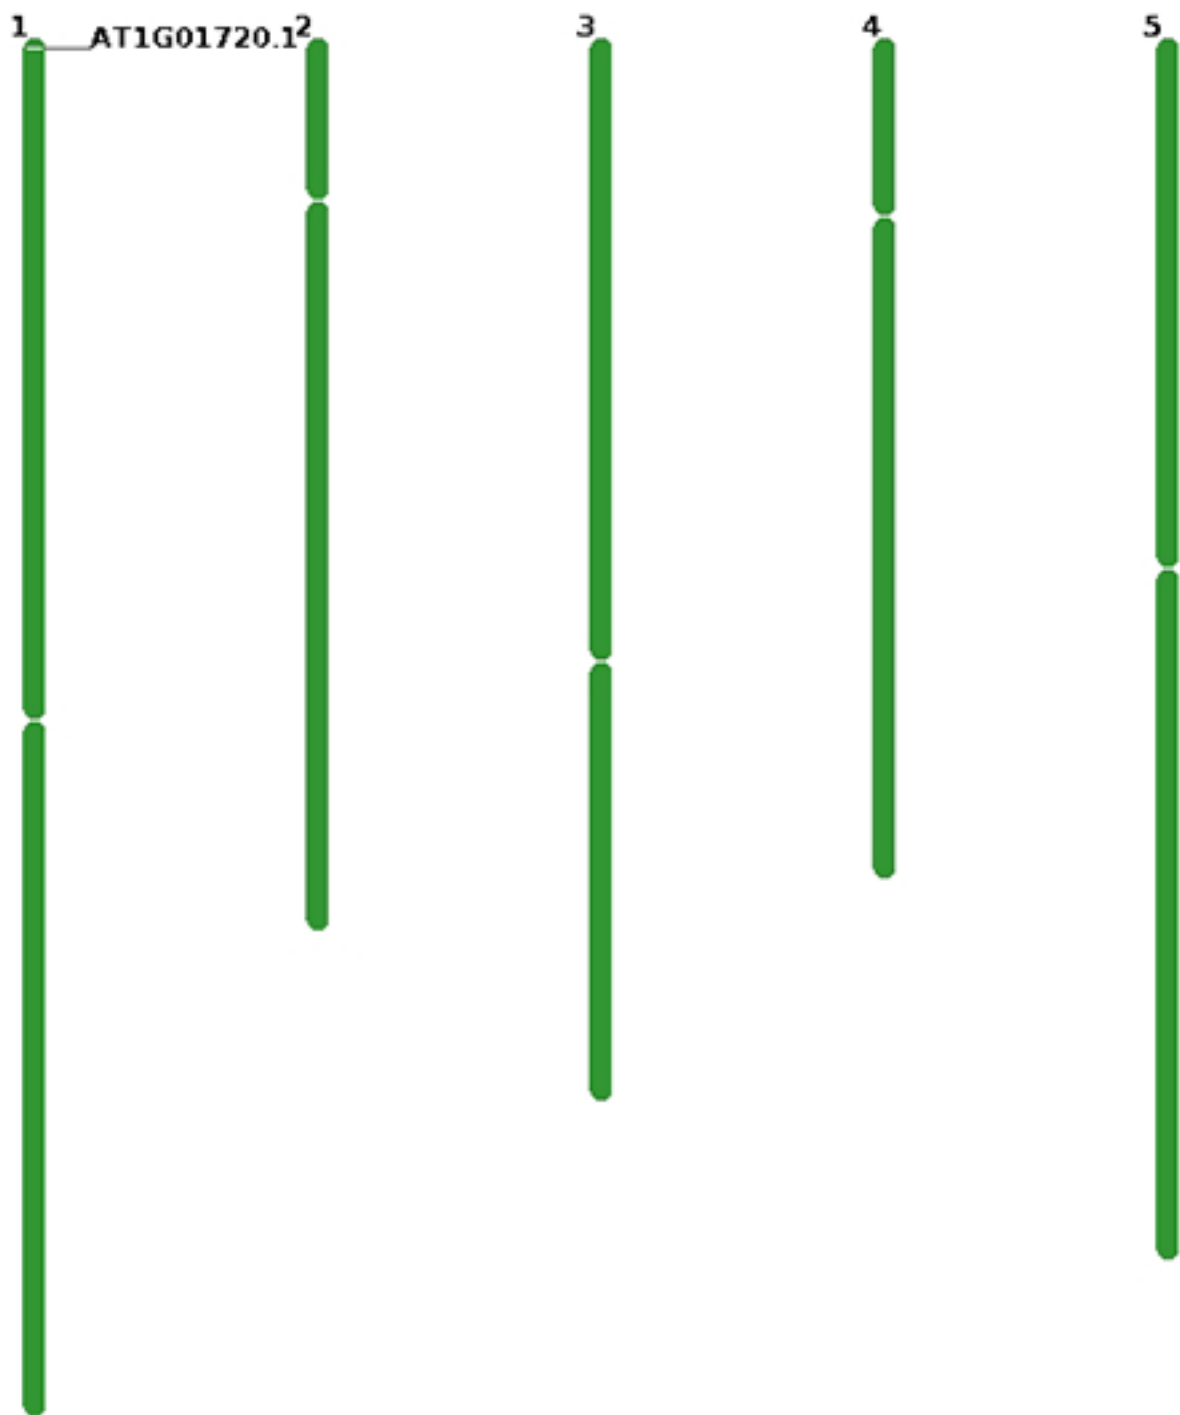

Supplement: s1 [file s1]

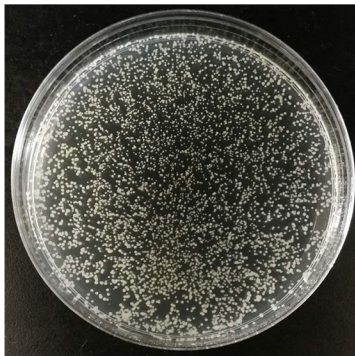

AbA 0 ng/ml

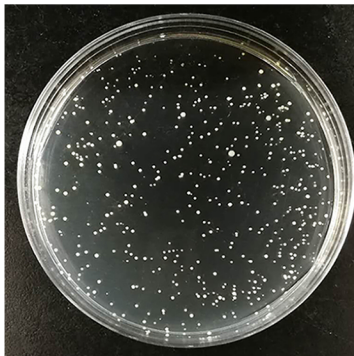

100ng/ml

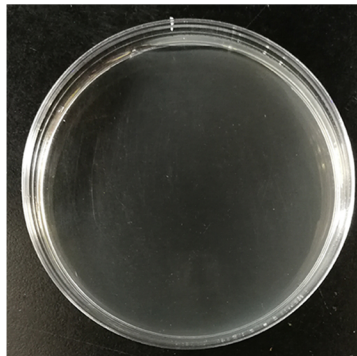

150ng/ml

Supplement: s1 [file s1]
